# Supplementary material
Source: PubMed Central journal article supplement (PMC2998177)
Supplement: NIHMS233243-supplement-2.pdf [file NIHMS233243-supplement-2.pdf]

|                           |                                                                                        |
|---------------------------|----------------------------------------------------------------------------------------|
| CG13102mel<br>rcCG9573mel | AGTTTAAAGCGAATCGACATCTTGCAAAGTTGTA<br>CTACTACAGTTAAGTGTGAAGTAAAAATA 60<br>-----        |
| CG13102mel<br>rcCG9573mel | TTTAAACCAAAA <b>ATGTATATGAAAGCTTTAATAGTCAGCATACTTGTGGCCTTTGTGTGTG</b> 120<br>-----     |
| CG13102mel<br>rcCG9573mel | <b>TGCAAATTGGT</b> GAGTCAATTGCGTAAAATGTGAAATTCGAGATCAACTGATTGTTTTTAA 180<br>-----      |
| CG13102mel<br>rcCG9573mel | CATGGATTATAG <b>CTGATTCCCTGAAGTGTTACACCTGCGTAACGCCAAAGGACTGCAAGA</b> 240<br>-----      |
| CG13102mel<br>rcCG9573mel | <b>GTCCCAAGAAAGTCACCTGCACGAATGCGGCTGCGAATGAGACTAGTTACTACCTGGGTG</b> 300<br>-----       |
| CG13102mel<br>rcCG9573mel | <b>TCTATCATCAGAATGTTGGCAACCTAACCAGCACGCGATTTCGATTGCCTGGCTCTGAAGT</b> 360<br>-----      |
| CG13102mel<br>rcCG9573mel | <b>ACAACTGGAGT</b> GAGTAGCGTGCGGGACCCCAGAAGCGGACTATAAAGATTTATTA<br>ACTACT 420<br>----- |
| CG13102mel<br>rcCG9573mel | TTCCACTTGCCAG <b>ATAACGATGTGATCCATCAGCTCCATGGCTGTGTGCATCCAATGTT</b> 480<br>-----       |
| CG13102mel<br>rcCG9573mel | <b>GGAGCCTGCAGCTTAGCACTTAAGCCGGCCTATGCTCACTACAATAAGACCTGGTGTCTC</b> 540<br>-----       |
| CG13102mel<br>rcCG9573mel | <b>ACCTGTTCCGGGCGACAAGTGCAACAAGAATCCGGCCGAAAGATGAGCAGCAGCACTATT</b> 600<br>-----       |

|                           |                                                                                                                                              |
|---------------------------|----------------------------------------------------------------------------------------------------------------------------------------------|
| CG13102mel<br>rcCG9573mel | <b>GCCATCGCGTCTAGCGTTCTGGGTCTCTTGCTGGTCAAGATGTATGCCTAGTGTGACTAT</b> 660<br>-----                                                             |
| CG13102mel<br>rcCG9573mel | TAATAAATATGAGCTAGGAGCTATGATATTTTATATTTGATATTTTTTATTGTACCGTCA 720<br>-----ATATTTGATATTTTTTATTGTACCGTCA 28                                     |
| CG13102mel<br>rcCG9573mel | ATTTTAGTAATATCATAATTTTCATTTGTAGATTATGTAGGCCATGTTTATTCGGTCGAGC 780<br>ATTTTAGTAATATCATAATTTTCATTTGTAGATTATGTAGGCCATGTTTATTCGGTCGAGC 88        |
| CG13102mel<br>rcCG9573mel | AGTTAACTAGGAGTGGGTATCACTAATCGATGGCGCTTGAATGGACGGTGGAGTGACGAA 840<br>AGTTAACTAGGAGTGGGTATCACTAATCGATGGCGCTTGAATGGACGGTGGAGTGACGAA 148         |
| CG13102mel<br>rcCG9573mel | AGTTGTTGGGCGCTTCTCTAGGAGGAGCCCATTGGGTTGACGGCGTTTGTCTGCAGGTTT 900<br>AGTTGTTGGGCGCTTCT <b>CTAGGAGGAGCCCATTGGGTTGACGGCGTTTGTCTGCAGGTTT</b> 208 |
| CG13102mel<br>rcCG9573mel | TTGAGCAGCATCTGCAGCCACTGCTTGGTGCACGTGTCATGTTGCACGAGCGACGTGAAG 960<br><b>TTGAGCAGCATCTGCAGCCACTGCTTGGTGCACGTGTCATGTTGCACGAGCGACGTGAAG</b> 268  |
| CG13102mel<br>rcCG9573mel | GTGCCGTCACGCAGCAGATCCGGCAGACACACTCTAAGTGCCTGCGAGCGCGGCATTT 1020<br><b>GTGCCGTCACGCAGCAGATCCGGCAGACACACTCTAAGTGCCTGCGAGCGCGGCATTT</b> 328     |
| CG13102mel<br>rcCG9573mel | TCCGTAAGTAGTAGATAGCAGCGCACCACATGCTTCAGCACCCGGAGGCATGGAACTTC 1080<br><b>TCCGTAAGTAGTAGATAGCAGCGCACCACATGCTTCAGCACCCGGAGGCATGGAACTTC</b> 388   |
| CG13102mel<br>rcCG9573mel | AACATATGGATGACCATTTTGTCCAGGGTGATGGCCACCTGCGAGAAGCGATCGTGGTTC 1140<br><b>AACATATGGATGACCATTTTGTCCAGGGTGATGGCCACCTGCGAGAAGCGATCGTGGTTC</b> 448 |
| CG13102mel<br>rcCG9573mel | TCGCAAATGTACGTCAGACCCATCTCATCGAGCAGTATCTTCTCAAGGATTGAAGTGGCC 1200<br><b>TCGCAAATGTACGTCAGACCCATCTCATCGAGCAGTATCTTCTCAAGGATTGAAGTGGCC</b> 508 |
| CG13102mel<br>rcCG9573mel | GCGATCTTGGTCAGCTTCGATCCCCTGACCATATTGGTCAGACAGTGAGGCACGACCTCG 1260<br><b>GCGATCTTGGTCAGCTTCGATCCCCTGACCATATTGGTCAGACAGTGAGGCACGACCTCG</b> 568 |
| CG13102mel<br>rcCG9573mel | CTCCATATCAGGAAGATGAGGACCTCCGTATCACCGGTCTCGGCCAGAGCATTAAATCAG 1320<br><b>CTCCATATCAGGAAGATGAGGACCTCCGTATCACCGGTCTCGGCCAGAGCATTAAATCAG</b> 628 |

|             |                                                                      |      |
|-------------|----------------------------------------------------------------------|------|
| CG13102mel  | CCCAGCGTGGTCAGGCGCAGCTGCTCGAAGGGCCTGCTCTTGAACGTGGTCGACAAGAAG         | 1380 |
| rcCG9573mel | <b>CCCAGCGTGGTCAGGCGCAGCTGCTCGAAGGGCCTGCTCTTGAACGTGGTCGACAAGAAG</b>  | 688  |
| CG13102mel  | GGGTACAAGTACATCGGTATCTGGTCCCAGGAAGGCCGGGCGAGTCTCCGGATGCGAG           | 1440 |
| rcCG9573mel | <b>GGGTACAAGTACATCGGTATCTGGTCCCAGGAAGGCCGGGCGAGTCTCCGGATGCGAG</b>    | 748  |
| CG13102mel  | GCGACGCACTGTAGCAAAGTCAGGGCGTAGCACACGCGGTTTCGACTGGTTGGCCTTCAAA        | 1500 |
| rcCG9573mel | <b>GCGACGCACTGTAGCAAAGTCAGGGCGTAGCACACGCGGTTTCGACTGGTTGGCCTTCAAA</b> | 808  |
| CG13102mel  | ACGGGCGTCGTTATTATGGGGTATATGTTGACGATCTCCTGCAGCAGGGTGCAGGTGGTA         | 1560 |
| rcCG9573mel | <b>ACGGGCGTCGTTATTATGGGGTATATGTTGACGATCTCCTGCAGCAGGGTGCAGGTGGTA</b>  | 868  |
| CG13102mel  | CCGACGCTTTTCCACAGCATGGGGGCCAGGTCCGCATAGGTGTTCTTGCTCAGCTCCAGC         | 1620 |
| rcCG9573mel | <b>CCGACGCTTTTCCACAGCATGGGGGCCAGGTCCGCATAGGTGTTCTTGCTCAGCTCCAGC</b>  | 928  |
| CG13102mel  | AGAGCGGTCTCCCGCGTGGCAGGATAGGCCAGCTCGATGATCAACTGGTACACCTTCTCC         | 1680 |
| rcCG9573mel | <b>AGAGCGGTCTCCCGCGTGGCAGGATAGGCCAGCTCGATGATCAACTGGTACACCTTCTCC</b>  | 988  |
| CG13102mel  | CGCTCGGCCTGCTGCTGGGGACTCATTACCGGACTTGGTTCCGCACTCATCGCAAAGCTG         | 1740 |
| rcCG9573mel | <b>CGCTCGGCCTGCTGCTGGGGACTCATTACCGGACTTGGTTCCGCACTCATCGCAAAGCTG</b>  | 1048 |
| CG13102mel  | GTTTTTTTTTCGCGTTAGCTTGCAAAGATCTAGTAGCTTGGAAAGATCTGGCTCCGGAATT        | 1800 |
| rcCG9573mel | GTTTTTTTTTCGCGTTAGCTTGCAAAGATCTAGTAGCTTGGAAAGATCTGGCTCCGGAATT        | 1108 |
| CG13102mel  | TCGACGGACGATTGAGAAACGTGGTTTTCGAGTTGGCGTCTATTGTGGTTATCGATATAAG        | 1860 |
| rcCG9573mel | TCGACGGACGATTGAGAAACGTGGTTTTCGAGTTGGCGTCTATTGTGGTTATCGATATAAG        | 1168 |
| CG13102mel  | CTTCAAGCGAGAAAGGACCGAAAGCACGTGGCCGAACAATGTGGCCAGAGCCGAGGAACG         | 1920 |
| rcCG9573mel | CTTCAAGCGAGAAAGGAC-----                                              | 1186 |
| CG13102mel  | CACGAATGCCATAAATTAATAAATAATTTCTTGTTTCGAA                             | 1959 |
| rcCG9573mel | -----                                                                |      |

CDS of CG13102 and CG9573 (i.e. Rcd-1r) are shown in bold  
P element is inserted in stock 11773 between the CG nucleotides shown in blue.
