# Supplementary material
Source: PubMed Central journal article supplement (PMC2998177)
Supplement: NIHMS233243-supplement-3.pdf [file NIHMS233243-supplement-3.pdf]

|              |                                                                 |     |
|--------------|-----------------------------------------------------------------|-----|
| Drcd-1r/Dsec | MSEEP I PVMSPQRQAEREKLYQLI IELAYPATREVALLELSKKNPDLAPMLWNSFGTSY  | 60  |
| Drcd-1r/Dsim | MSEEP I PVMTPQRQAEREKLYQLMIELAYPASREVALLELSKKNPDLAPMLWNSFGTSY   | 60  |
| Drcd-1r/Dmel | MSAEPSPVMSPQQQAEREKVYQLI IELAYPATRETALLELSKNTYADLAPMLWKSVMGTTTC | 60  |
|              | ** ** ***:***:*****:***:*****:***.*****:.. *****:*.**:          |     |
| Drcd-1r/Dsec | TLLQEVVNVYPFISNPILKANQSNRVCYALTLLQCVAHPGTRPAFLRGQIPVYVYPFIS     | 120 |
| Drcd-1r/Dsim | TLLQEVVNVYPFISNPILKANQSNRVCYALTLLQCVAHPGTRPAFLRGQIPVYVYPFIS     | 120 |
| Drcd-1r/Dmel | TLLQEIVNIYPIITTPVLKANQSNRVCYALTLLQCVASHPETRPAFLRDQIPMYLYPFLS    | 120 |
|              | *****:***:***:*.*:..*:*****:*****:*** *****.***:*.***:*         |     |
| Drcd-1r/Dsec | TTFKSKPFQRLRLNSLRVIGALVETDDTEAISFLLSTEVVPLCLSNMLKGSMLTKFAAIK    | 180 |
| Drcd-1r/Dsim | TTFKSKPFQRLRLNSLGVIGALVETDDTEAISFLLSSEVVPLCLSNMLKGSMLTKSAAIK    | 180 |
| Drcd-1r/Dmel | TTFKSRPFQRLRLTTLGVINALAETGDTEVLIFLIWSEVVPCLTNMVRGSKLTKIAATS     | 180 |
|              | *****:*****.:* **.*.*.*.*.*.*. : ** : ***** **.*.*.:** *** ** . |     |
| Drcd-1r/Dsec | IIEKILLNETGLSYICETHDRFAGVAITLGKMTIRMMKSPCFRVLKHVVR CYLLLTENEI   | 240 |
| Drcd-1r/Dsim | IIEKILLNKTGLSYICETHDRFARVATTLGKMTIRMMKYPCFRVLKRVVRCYLLITENEL    | 240 |
| Drcd-1r/Dmel | IIEKILLDEMGLTYICENHDRFSQVAITLGKMTIHMVKFPCFRVLKHVVR CYLLLTENAR   | 240 |
|              | *:*****.: **:*****.*****: ** *****.*:*:* **:******:*****:***    |     |
| Drcd-1r/Dsec | ARSALGVCLPDQLRDGTFSSAIQHDTCTKQWLKTLKLNLEPRAPAAVQQVVE SPQDS      | 297 |
| Drcd-1r/Dsim | GRSALRVCLPDPLRDGTFSSAMQHDPCAQWLKTLKLNLESRAPAVMLQVVEST EGS       | 297 |
| Drcd-1r/Dmel | ARSALRVCLPDLRLRDGTFSTLVQHDTCTKQWLQMLLKNLQTNVAVNPMGSS-----       | 290 |
|              | .**** ***** *****:* :***.*:*****: *****:..* : .                 |     |
