# Supplementary material
Source: PubMed Central journal article supplement (PMC2998177)
Supplement: NIHMS233243-supplement-5.pdf [file NIHMS233243-supplement-5.pdf]

**Supplementary Table 1.** Name, sequences and the use of the oligoprimers utilized in this work are given

| <b>Primer name</b>                          | <b>Sequence</b>                | <b>Use</b>       |
|---------------------------------------------|--------------------------------|------------------|
| Gapdh2 (forward)                            | 5'TCAGCCATCAGAGTCGATTC3'       | RT-PCR           |
| Gapdh2 (reverse)                            | 5'CAAACGAACATGGGAGCATC3'       | RT-PCR           |
| M <sub>13</sub> (forward)                   | 5'GTAAAACGACGGCCAG3'           | PCR & sequencing |
| M <sub>13</sub> (reverse)                   | 5'CAGAAACAGCTATGAC3'           | PCR & sequencing |
| 5'RACE (outer) Drdc-1r                      | 5'TTGGCCTTCAAAAACGGGCGT-3'     | PCR & sequencing |
| 5'RACE (inner) Drdc-1r                      | 5'TGCTGCTGGGGACTCATTAC-3'      | PCR & sequencing |
| 3'RACE (outer) CG13102                      | 5'AGCAGATCCGGCAGACACAC3'       | PCR & sequencing |
| 3'RACE (inner) CG13102                      | 5'AGCAGGCCCTTCGAGCAGCT3'       | PCR & sequencing |
| Primers overlapping (forward)               | 5'CACATGCTTCAGCACCCGGA3'       | PCR & sequencing |
| Primers overlapping (reverse)               | 5'AGCAGGCCCTTCGAGCAGCT3'       | PCR & sequencing |
| Primers coding region (forward)             | 5'CAGCATACTTGTGGCCTTTG3'       | PCR & sequencing |
| Primers coding region (reverse)             | 5'CTTGACCAGCAAGAGACCCA3'       | PCR              |
| Specific primer                             | 5'AGCAGATCCGGCAGACACAC3'       | PCR              |
| McDonald-Kreitman (forward) D. melanogaster | 5'CACAATAGACGCCAACTCGAAACCAC3' | PCR & sequencing |
| McDonald-Kreitman (reverse) D. melanogaster | 5'TGGCGCTTGAATGGACGGT3'        | PCR & sequencing |
| McDonald-Kreitman (forward) D. simulans     | 5'CACAATCGACGCCAAATCGAATGCAC3' | PCR & sequencing |
| McDonald-Kreitman (reverse) D. simulans     | 5'ATGGCGCTTGCATGGAC3'          | PCR & sequencing |

|                                        |                              |                  |
|----------------------------------------|------------------------------|------------------|
| 5'SUP                                  | 5'TCCAGTCACAGCTTTGCAGC3'     | PCR & sequencing |
| 3'SUP                                  | 5'TATCGCTGTCTCACTCAG3'       | PCR & sequencing |
| Flanking 5'                            | 5'-TTCCTCGGCTCTGGCCACAT-3'   | PCR & sequencing |
| Flanking 3'                            | 5'-CCAGGTCCGCATAGGTGTTC-3'   | PCR & sequencing |
| dsRNA detection End 5' forward - outer | 5'-TCGCGGCCACTTCAATCCTTG-3'  | Nested PCR       |
| dsRNA detection End 5' reverse - outer | 5'-TGGCGCTTGAATGGACGGT-3'    | Nested PCR       |
| dsRNA detection End 5' forward - inner | 5'-AAGTTTCCATGCCTCCGGGTGC-3' | Nested PCR       |
| dsRNA detection End 5' reverse - inner | 5'-TTGGGTTGACGGCGTTTGTC-3'   | Nested PCR       |
| dsRNA detection End 3' forward - outer | 5'-ATAGGTGTTCTTGCTCAGCTC-3'  | Nested PCR       |
| dsRNA detection End 3' reverse - outer | 5'-GTTTCTCAATCGTCCGTCG-3'    | Nested PCR       |
| dsRNA detection End 3' forward - inner | 5'-GATGATCAACTGGTACACCTT-3'  | Nested PCR       |
| dsRNA detection End 3' reverse - inner | 5'-CTTTGCGATGAGTGCGGAAC-3'   | Nested PCR       |
| Gapdh2 (forward)                       | 5' TCAGCCATCAGAGTCGATTC 3'   | QRT-PCR          |
| Gapdh2 (reverse)                       | 5' CAAACGAACATGGGAGCATC 3'   | QRT-PCR          |
| CG13102 (forward)                      | 5'GAATGAGACTAGTTACTACCTG 3'  | QRT-PCR          |
| CG13102 (reverse)                      | 5' GCTTAAGTGCTAAGCTGCAG 3'   | QRT-PCR          |
| Overlap 2 (forward)                    | 5' AGCAGATCCGGCAGACACAC 3'   | QRT-PCR          |
| Overlap 2 (reverse)                    | 5'AGATCGCGGCCACTTCAATC3'     | QRT-PCR          |
| Primers overlapping (forward)          | 5'CACATGCTTCAGCACCCGGA3'     | QRT-PCR          |
| Primers overlapping (reverse)          | 5'AGCAGGCCCTTCGAGCAGCT3'     | QRT-PCR          |
