# Supplementary material
Source: PubMed Central journal article supplement (PMC2998177)
Supplement: NIHMS233243-supplement-6.pdf [file NIHMS233243-supplement-6.pdf]

**Supplementary Table 2.** Results of assessment of PCR efficiency of primers.

| <b>Primers name</b>                              | <b>Primer Sequence</b>                                    | <b>Related efficiency</b>        |
|--------------------------------------------------|-----------------------------------------------------------|----------------------------------|
| <i>Gapdh2</i> Forward<br><i>Gapdh2</i> Reverse   | 5' TCAGCCATCAGAGTCGATTC 3'<br>5' CAAACGAACATGGGAGCATC 3'  | $m = -4.41410$ ;<br>$E = 1.6848$ |
| <i>CG13102</i> Forward<br><i>CG13102</i> reverse | 5'GAATGAGACTAGTTACTACCTG 3'<br>5' GCTTAAGTGCTAAGCTGCAG 3' | $m = -3.79769$<br>$E = 1.8337$   |
| Overlap Forward<br>Overlap Reverse               | 5' CACATGCTTCAGCACCCGGA 3'<br>5' AGCAGGCCCTTCGAGCAGCT 3'  | $m = -4.1351$ ;<br>$E = 1.7451$  |
| Overlap 3' Forward<br>Overlap 3' Reverse         | 5' AGCAGATCCGGCAGACACAC 3'<br>5' AGATCGCGGCCACTTCAATC 3'  | $m = -3.9783$ ;<br>$E = 1.7800$  |
