# Supplementary material
Source: PubMed Central journal article supplement (PMC2998177)
Supplement: NIHMS233243-supplement-7.pdf [file NIHMS233243-supplement-7.pdf]

**Supplementary table 3.** Comparison of likely positively selected codons identified by REL analyses.

| <b>Codon</b> | <b>REL Bayes Factor</b> |
|--------------|-------------------------|
| 180          | 66.16                   |
| 204          | 60.58                   |
| 240          | 70.34                   |
| 252          | 54.98                   |
| 261          | 57.48                   |
| 281          | 61.14                   |

Codons that had Bayes factor  $\geq 50$  were included in the results . All BEB posterior probabilities were  $> 0.99$ .
